# Supplementary material
Source: publisher site journal article supplement (https://www.dovepress.com/article/259336)
Supplement: Supplementary file 1 [file get_supplementary_file.php]

**Supplementary Table 1.** Targets of NCK1-AS1 predicted by ENCORI

| **lncRNA** | **miRNA targets** |
| --- | --- |
| NCK1-AS1 | hsa-miR-361-5p |
| hsa-miR-137 |
| hsa-miR-526b-5p |
| hsa-miR-9-3p |
| hsa-miR-500b-5p |
| hsa-miR-2114-5p |
| hsa-miR-670-5p |
| hsa-miR-3909 |
| hsa-miR-22-3p |
| hsa-miR-1197 |

**Supplementary Table 2.** Top 20 targets of miR-137 predicted by ENCORI

| **miRNA** | **mRNA targets** |
| --- | --- |
| miR-137 | BCL2L11 |
| H3F3B |
| DNAJB9 |
| CN1P1R1 |
| NUP43 |
| CIC |
| SSFA2 |
| SERTAD3 |
| MYLIP |
| TOB1 |
| DUSP5 |
| PLEKHB2 |
| MARCH9 |
| PCMTD1 |
| BTG2 |
| SOX4 |
| FNDC3B |
| WASL |
| COLGA3 |
| EIF4G2 |
